# Supplementary material for: Astrocyte-Targeted Transporter-Utilizing Derivatives of Ferulic Acid Can Have Multifunctional Effects Ameliorating Inflammation and Oxidative Stress in the Brain
Source: Hindawi journal article supplement (doi:10.1155/2019/3528148), 2019-11-13
Supplement: f1 [file 3528148.f1.pdf]

## Supporting Information

# Astrocyte-Targeted Transporter-Utilizing Derivatives of Ferulic Acid Can Have Multifunctional Effects Ameliorating Neuroinflammation and Oxidative Stress in the Brain

Ahmed Montaser,<sup>1,#</sup> Johanna Huttunen,<sup>1,#</sup> Sherihan Abdelhamid Ibrahim,<sup>2</sup> Kristiina M. Huttunen<sup>1,\*</sup>

<sup>1</sup> School of Pharmacy, Faculty of Health Sciences, University of Eastern Finland,

P.O. Box 1627, FI-70211 Kuopio, Finland

<sup>2</sup> Department of Pharmacology and Therapeutics, Faculty of Pharmacy and Drug Manufacturing,

Pharos University, 21311 Alexandria, Egypt

\* Corresponding author, E-mail: kristiina.huttunen@uef.fi

### Contents

1. Uptake of Ferulic Acid and Its LAT1-Utilizing Derivatives into Astrocytes via LAT1 ..... 2
2. Intracellular Unbound Concentrations of Ferulic Acid and Its LAT1-Utilizing Derivatives ..... 3
3. Ability of Ferulic Acid and Its LAT1-Utilizing Derivatives to Inhibit Astrocyte Cell Growth..... 4
4. Ability of Ferulic Acid and Its LAT1-Utilizing Derivatives to Inhibit AChE/BuChE Activity ..... 5

1. Uptake of Ferulic Acid and Its LAT1-Utilizing Derivatives into Astrocytes via LAT1

A) Ferulic Acid (FA)

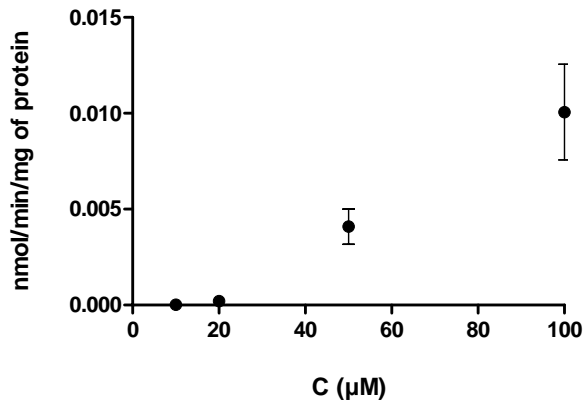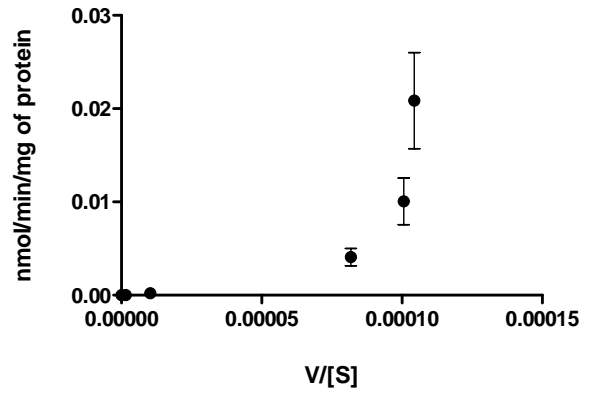

B) Derivative 1

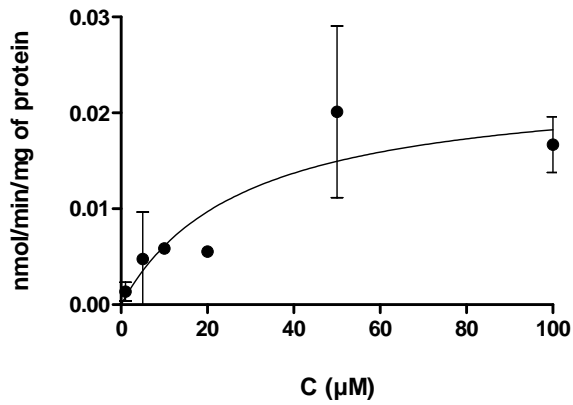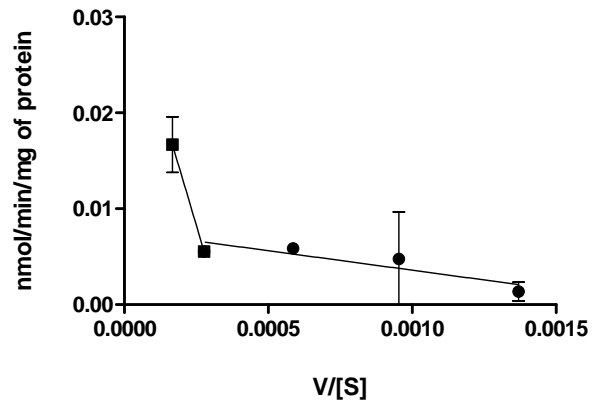

C) Derivative 2

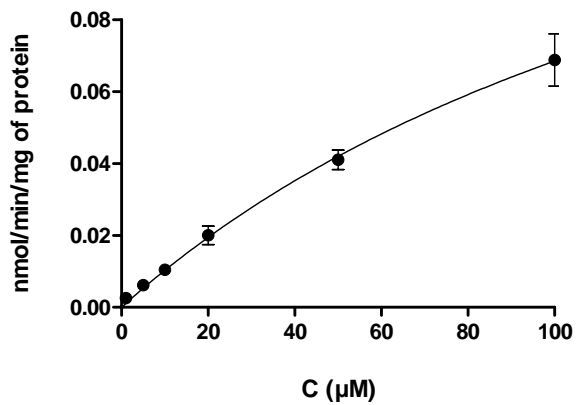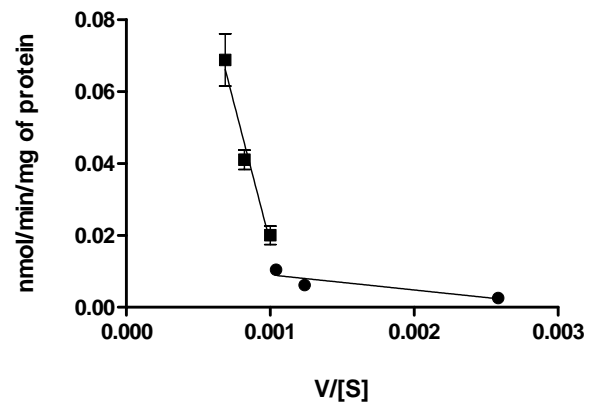

### D) Derivative 3

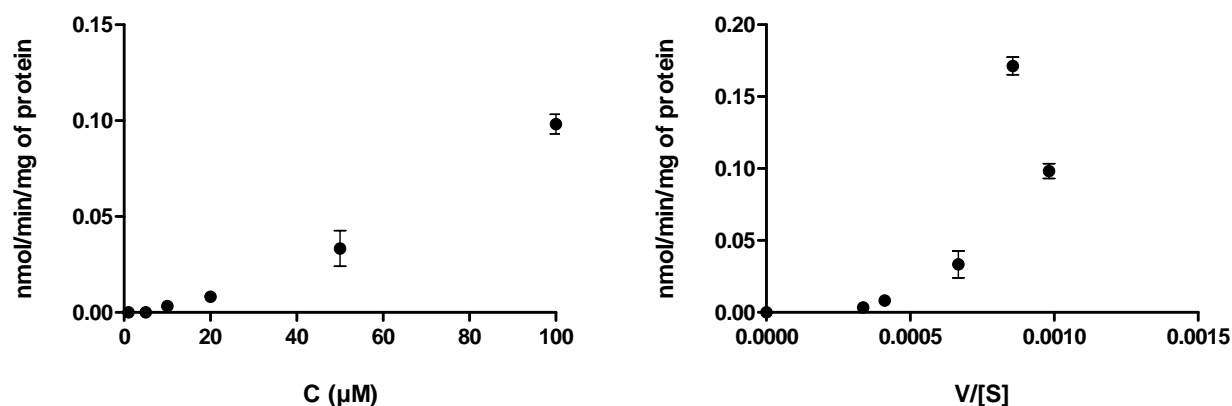

**Figure S1.** Cellular uptake of ferulic acid (A) and its LAT1-utilizing derivatives (1-3; B-C) into primary astrocytes over a concentration range 1-100  $\mu\text{M}$  (left) and the Eadie-Hofstee plots for transporter-mediated uptake mechanisms (right). The data is presented as mean  $\pm$  SD (n=3).

### 2. Intracellular Unbound Concentrations of Ferulic Acid and Its LAT1-Utilizing Derivatives

**Table S1.** Unbound Fraction,  $f_{u,\text{cell}}$  (%) of FA And Its LAT1-Utilizing Derivatives 1-3. The data is presented as mean  $\pm$  SD (n=3).

| Compound        | $f_{u,\text{cell}}$ (%)                   |
|-----------------|-------------------------------------------|
| FA              | Fully unbound                             |
| FA-Derivative 1 | $16.26 \pm 2.72$                          |
| FA-Derivative 2 | $8.06 \pm 0.54$                           |
| FA-Derivative 3 | Cannot be evaluated due to the metabolism |

### 3. Ability of Ferulic Acid and Its LAT1-Utilizing Derivatives to Inhibit Astrocyte Cell Growth

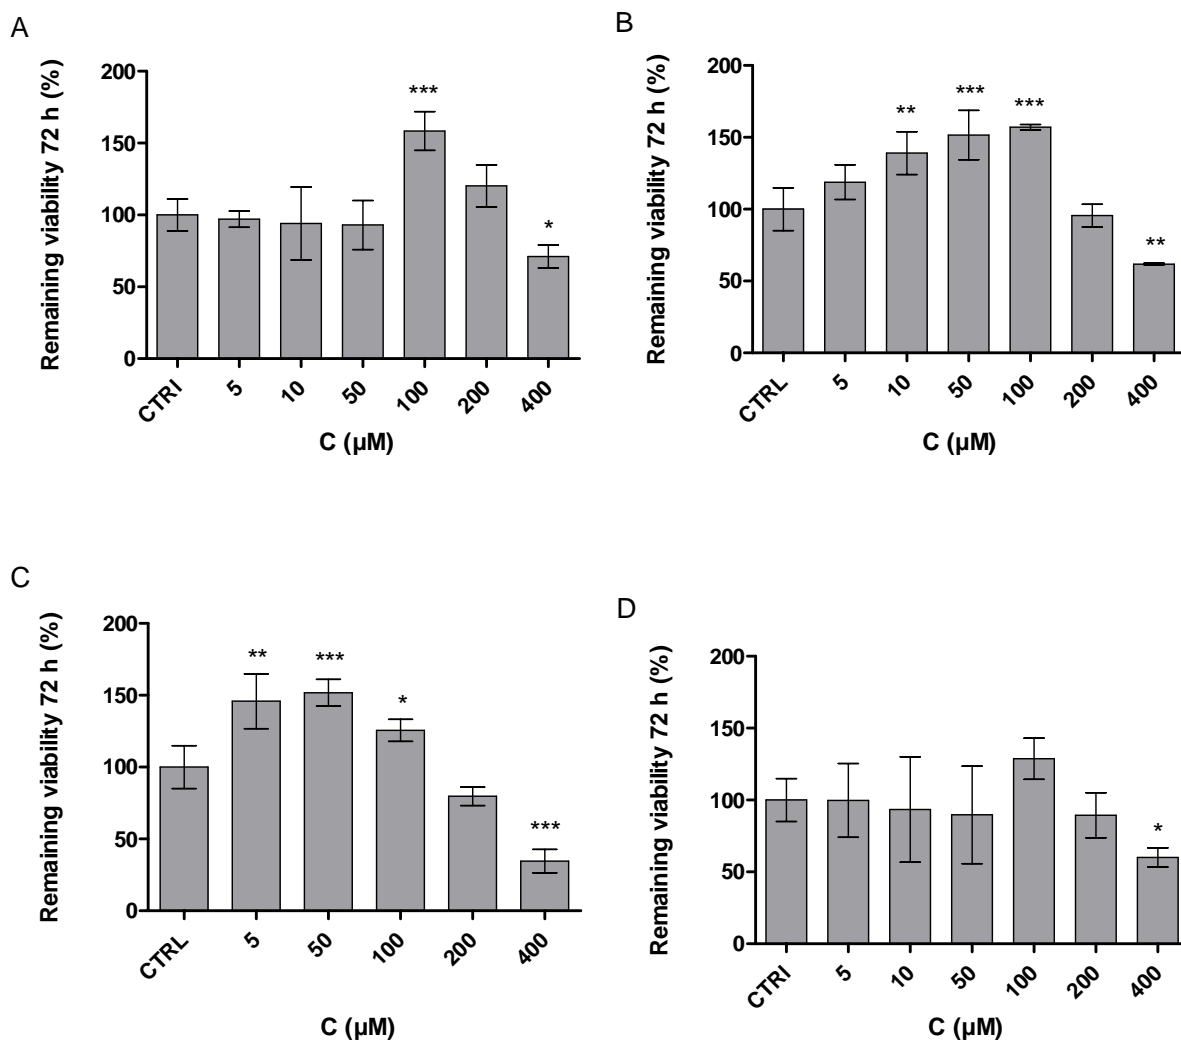

**Figure S2.** The remaining cell viability of primary astrocytes after 72 h incubation of 1-400 μM ferulic acid (A) and its LAT1-utilizing derivatives **1** (B), **2** (C) and **3** (D) presented as percentages (%) compared to the untreated cells (ctrl) (mean ± SD, n=3-6). An asterisk denotes a statistically significant difference from the respective control (\*\*\*  $P < 0.001$ , one-way ANOVA, followed by Tukey's test).

4. Ability of Ferulic Acid and Its LAT1-Utilizing Derivatives to Inhibit AChE/BuChE Activity

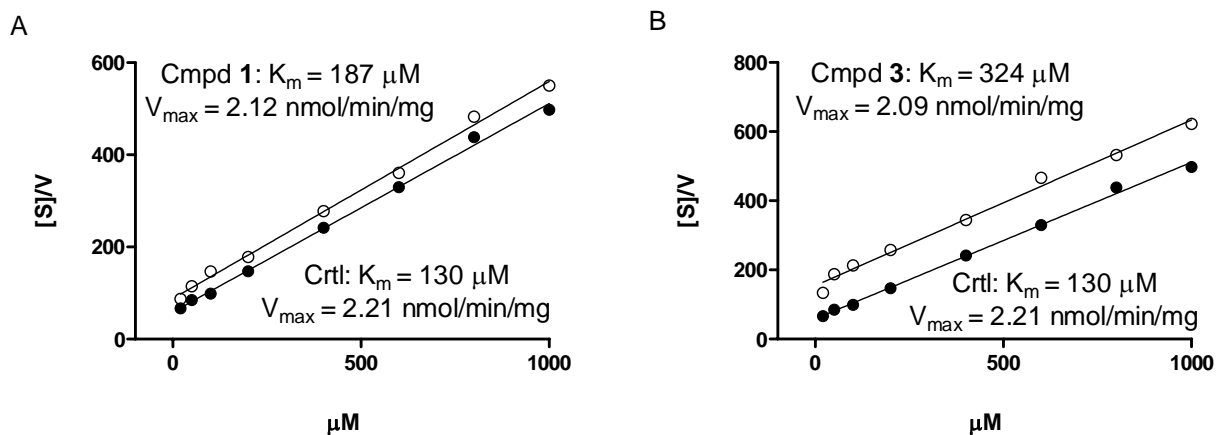

**Figure S3.** Hanes-Woolf's plots of AChE activity in the presense of 16-66  $\mu\text{M}$  FA-derivatives **1** and **3** (**A-B**, respectively; open circles) compared to the control (filled circles).
